# Supplementary material for: Seasonal variations in composition and sources of atmospheric ultrafine particles in urban Beijing based on near-continuous measurements
Source: Copernicus journal article supplement (doi:10.5194/egusphere-2023-809), 2023-05-08
Supplement: Supplementary file 1 [file egusphere-2023-809-supplement.pdf]

1 *Supporting Information of*

2 **Seasonal variations in composition and sources of atmospheric ultrafine particles**  
3 **in urban Beijing based on near-continuous measurements**

4 *Xiaoxiao Li<sup>1,2</sup>, Yijing Chen<sup>1</sup>, Yuyang Li<sup>1</sup>, Runlong Cai<sup>3</sup>, Yiran Li<sup>1</sup>, Chenjuan Deng<sup>1</sup>, Chao Yan<sup>3,4</sup>,*  
5 *Hairong Cheng<sup>2</sup>, Yongchun Liu<sup>4</sup>, Markku Kulmala<sup>3,4</sup>, Jiming Hao<sup>1</sup>, James N. Smith<sup>5\*</sup>, and Jingkun*  
6 *Jiang<sup>1\*</sup>*

7 <sup>1</sup> State Key Joint Laboratory of Environment Simulation and Pollution Control, School of Environment,  
8 Tsinghua University, 100084 Beijing, China

9 <sup>2</sup> School of Resources and Environmental Sciences, Wuhan University, 430072 Wuhan, China

10 <sup>3</sup> Institute for Atmospheric and Earth System Research / Physics, Faculty of Science, University of  
11 Helsinki, 00014 Helsinki, Finland

12 <sup>4</sup> Aerosol and Haze Laboratory, Beijing Advanced Innovation Center for Soft Matter Science and  
13 Engineering, Beijing University of Chemical Technology, 100029 Beijing, China

14 <sup>5</sup> Chemistry Department, University of California, Irvine, CA 92697, USA

15 *Correspondence to:* Jingkun Jiang ([jiangjk@tsinghua.edu.cn](mailto:jiangjk@tsinghua.edu.cn)) and James N. Smith  
16 ([jimsmith@uci.edu](mailto:jimsmith@uci.edu))

17

18 **This PDF file includes:**

19       Figures S1 to S12

20       Table S1

21

22

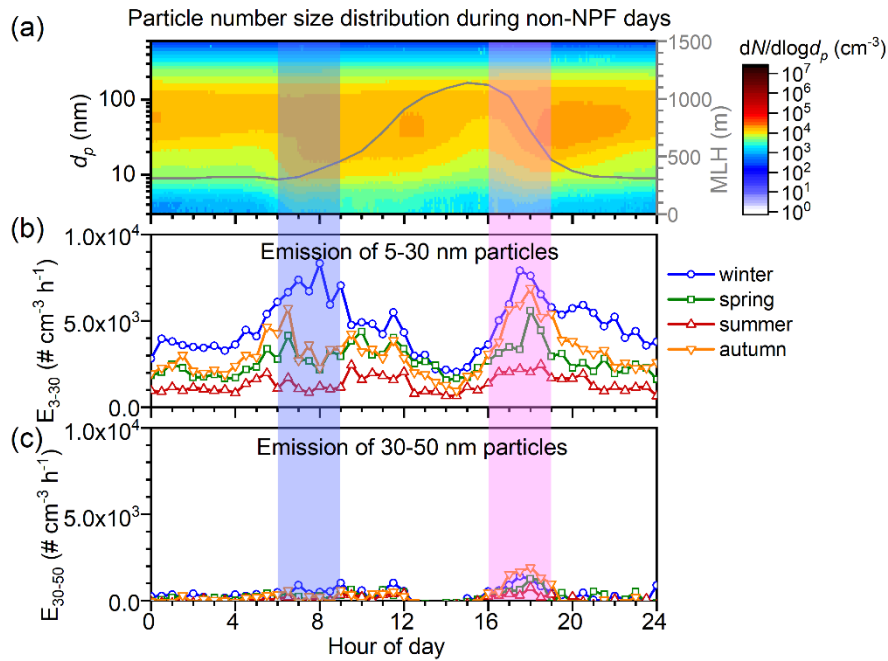

23

24 Figure S1. (a) Average diurnal variations of the particle size distributions during all the non-NPF days.  
 25 The calculated emission rates for (b) 3-30 nm particles and (c) 30-50 nm particles. The number  
 26 concentration valley at ~16:00 is possibly caused by the highest MLH, which increases from 8:00 in  
 27 the morning to the highest in 16:00, then gradually decreases to the lowest until ~18:00. The number  
 28 concentration peak at ~8:00 is possibly introduced by the emissions of 3-30 nm particles because that  
 29 the emission of 30-50 nm particles does not increase simultaneously with 3-30 nm particles. The  
 30 number concentration peak at ~18:00 is accompanied by both the emission of 3-30 nm particles and  
 31 the 30-50 nm particles, they could be caused by a combined effect of the decrease of MLH, as well as  
 32 primary emissions, or transportation. As a result, the morning peak at ~8:00 is chosen to study the  
 33 primary emission rates in the main text.

34

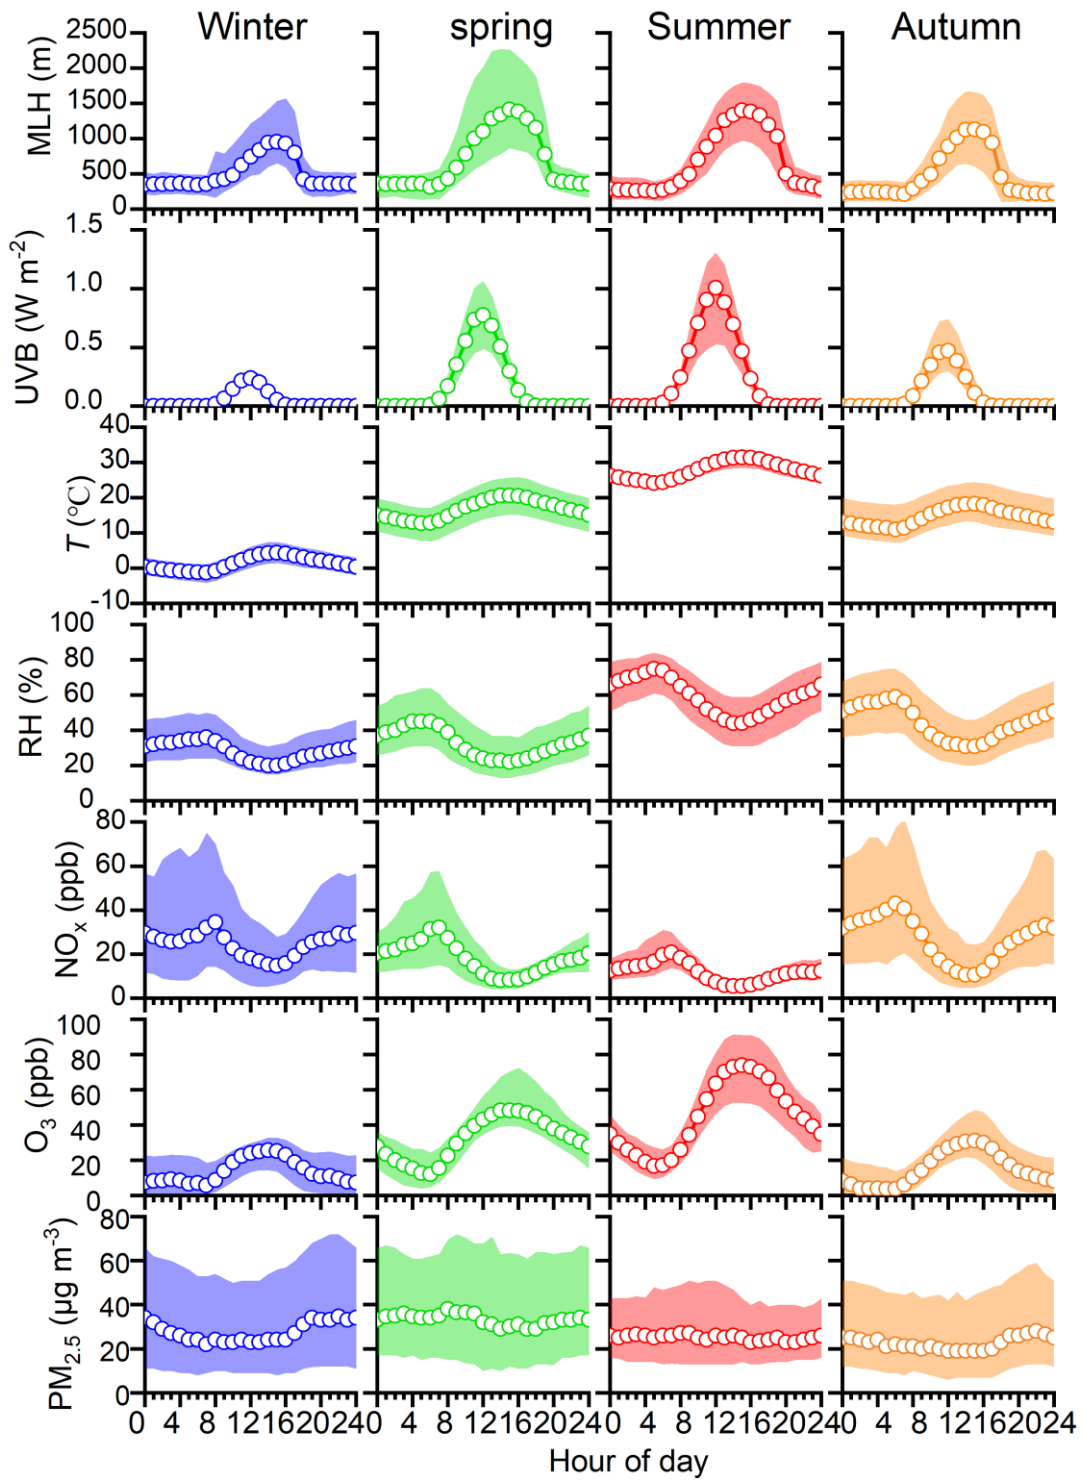

35

36 Figure S2. Diurnal variations of mixing layer height (MLH), solar radiation (UVB), temperature (T),  
 37 relative humidity (RH), NO<sub>x</sub> (NO + NO<sub>2</sub>), O<sub>3</sub>, and PM<sub>2.5</sub> concentrations in the four seasons.

38

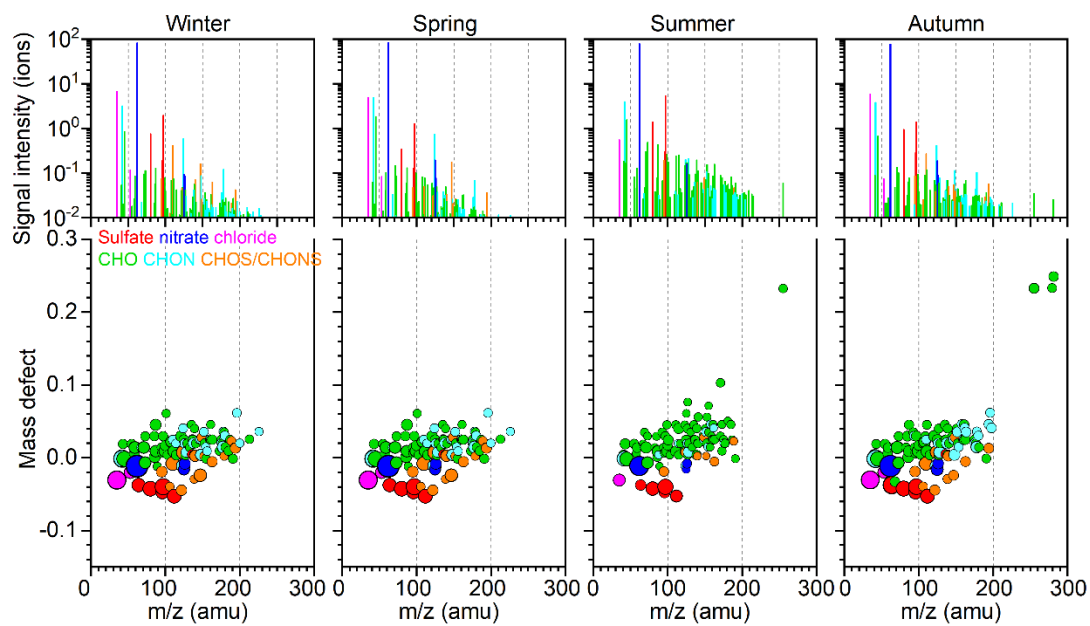

39

40 Figure S3. Details of the measured UFP composition over four seasons. (a) Mass spectra and (b) mass  
 41 defect of compounds with the top 100 highest signals measured by the TDCIMS.

42

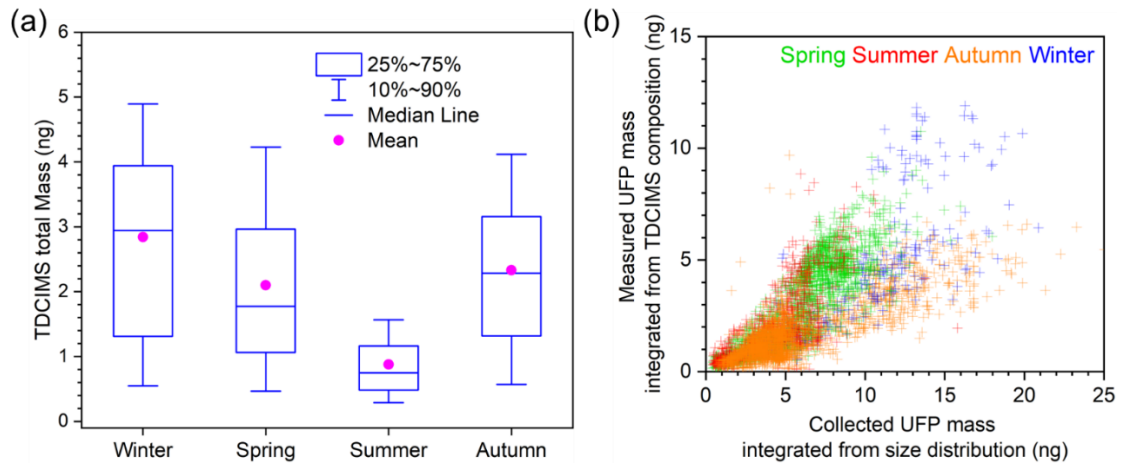

43

44 Figure S4. Seasonal variation of UFP mass (a) integrated from TDCIMS signals in negative ion mode;  
 45 and (b) its comparison with collected UFP masses integrated from size distributions assuming spherical  
 46 particles with a density of  $1.4 \text{ g cm}^{-3}$ .

47

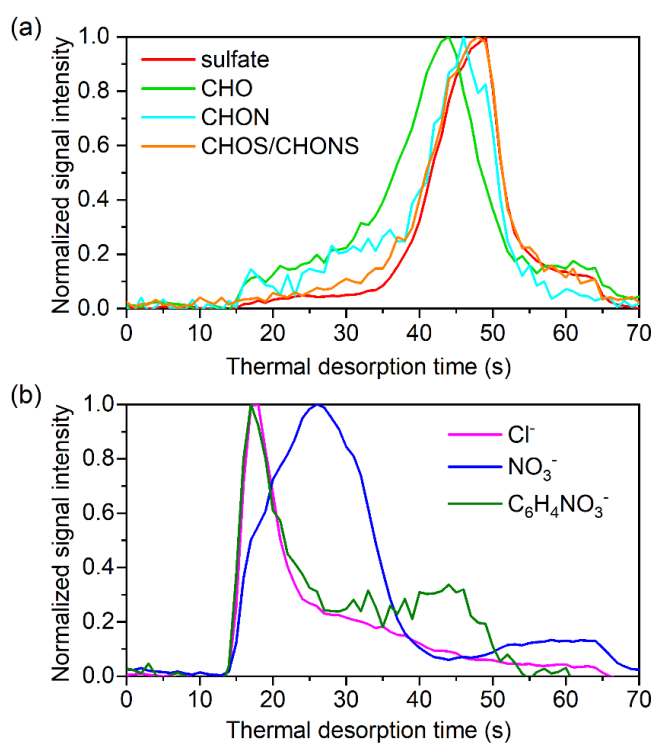

49

50 Figure S5. Averaged, normalized thermal desorption profiles of (a) the slowly desorbed compounds  
51 and (b) the quickly desorbed compounds. The signals are normalized to the corresponding highest  
52 signal of the thermal desorption curves.

53

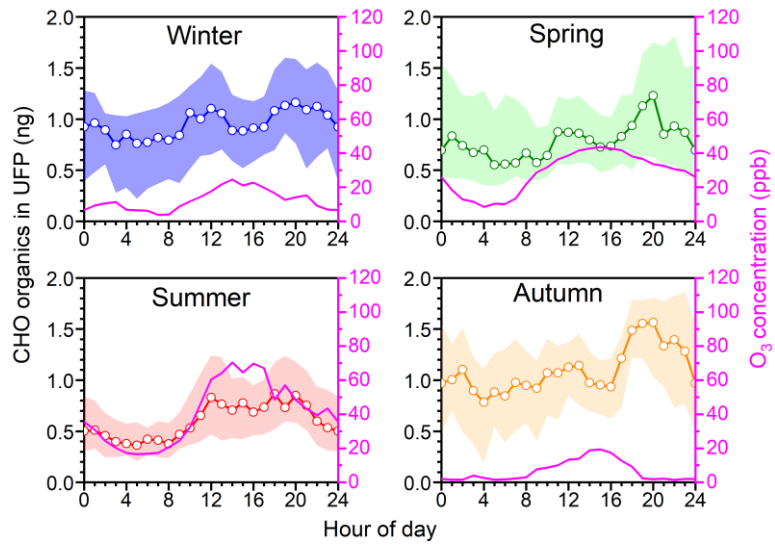

54

55 Figure S6. Diurnal variations of CHO organics and the corresponding O<sub>3</sub> variation over four seasons.

56

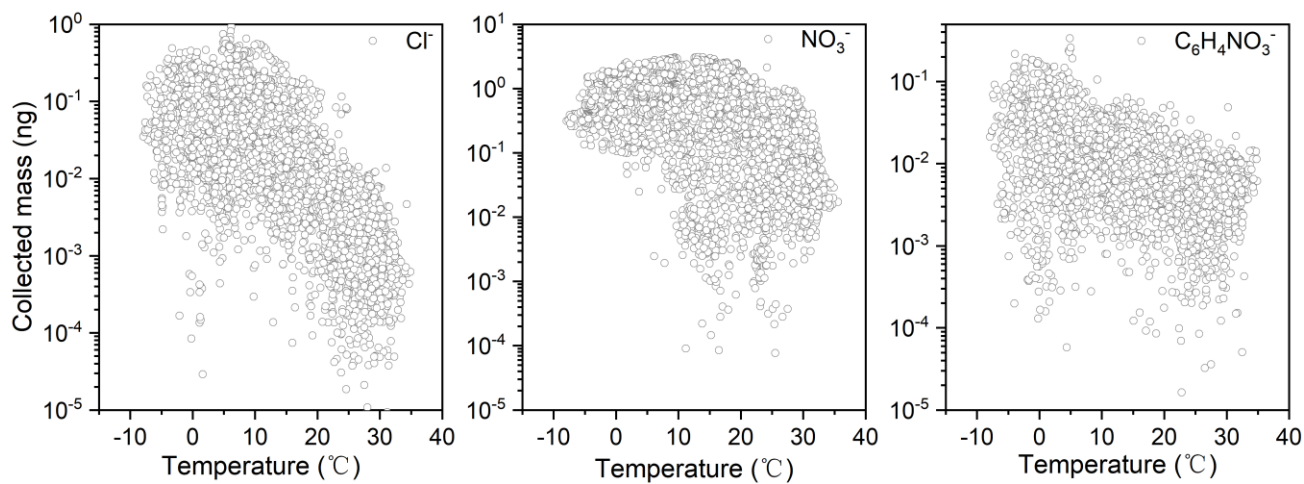

57

58 Figure S7. Negative temperature dependence of the quickly desorbed compounds (Cl<sup>-</sup>, NO<sub>3</sub><sup>-</sup>, and  
59 C<sub>6</sub>H<sub>4</sub>NO<sub>3</sub><sup>-</sup>) in UFPs.

60



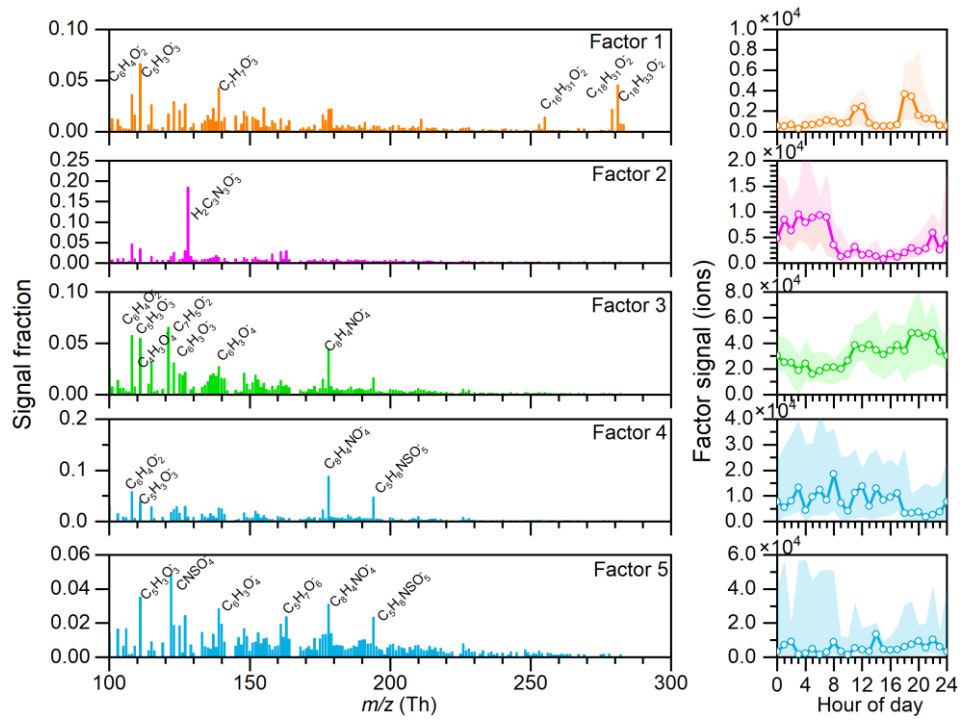

61

62 Figure S8. The PMF results for spring.

63

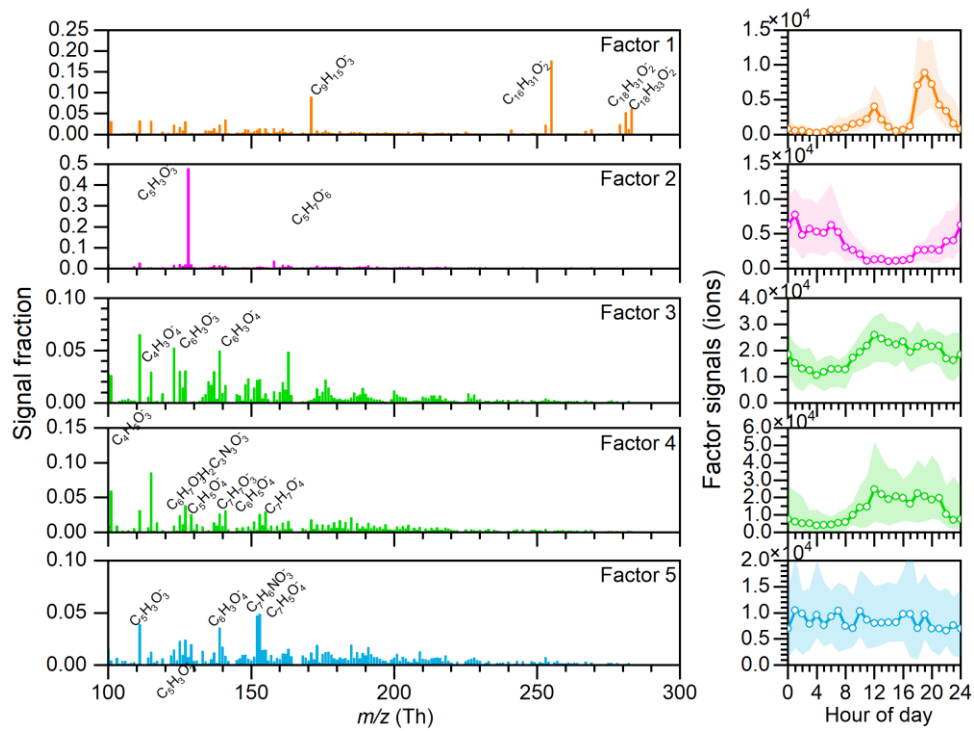

64

65 Figure S9. PMF results for summer.

66

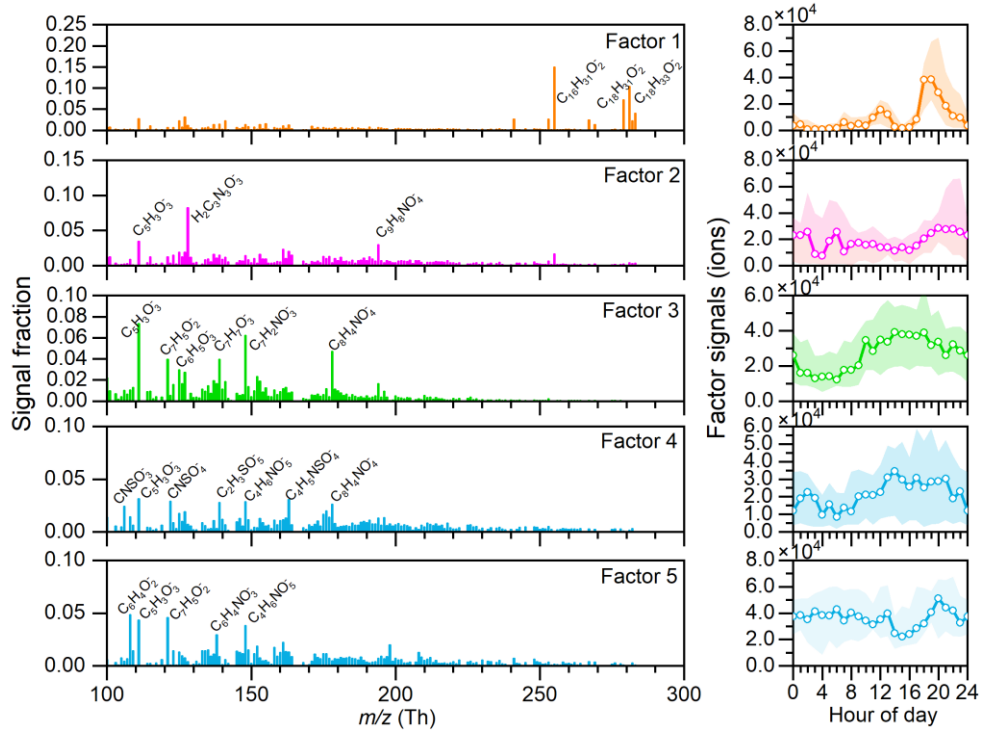

67

68 Figure S10. PMF results for autumn.

69

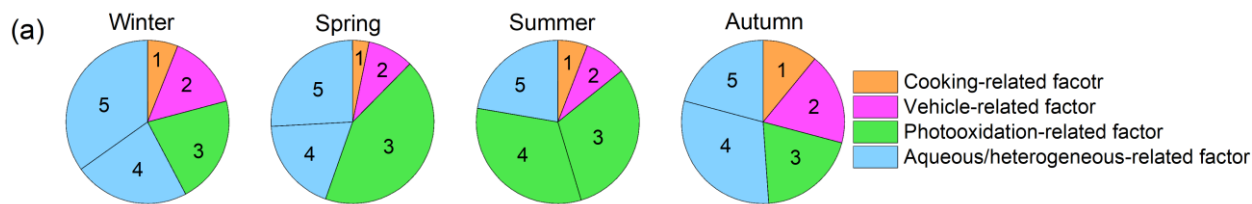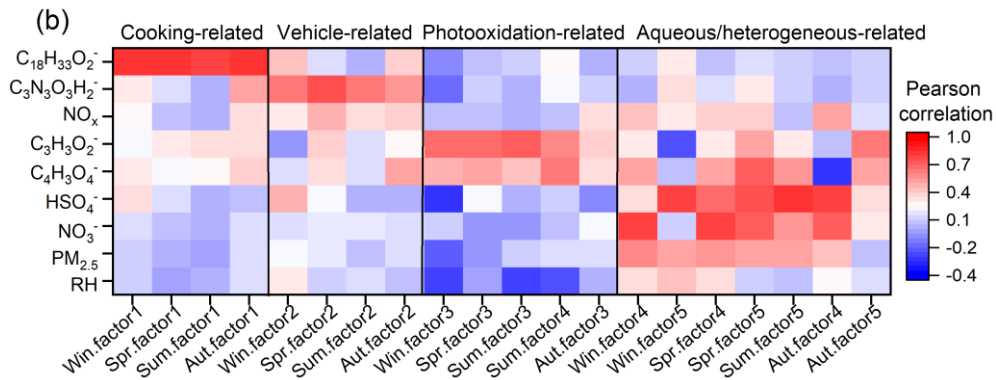

70

71 Figure S11. Summary of PMF factors during the four seasons. (a) PMF factor contribution for each  
 72 season; (b) correlation of 5 factors with the measured key species, trace gas, and  $PM_{2.5}$  for each season.

73

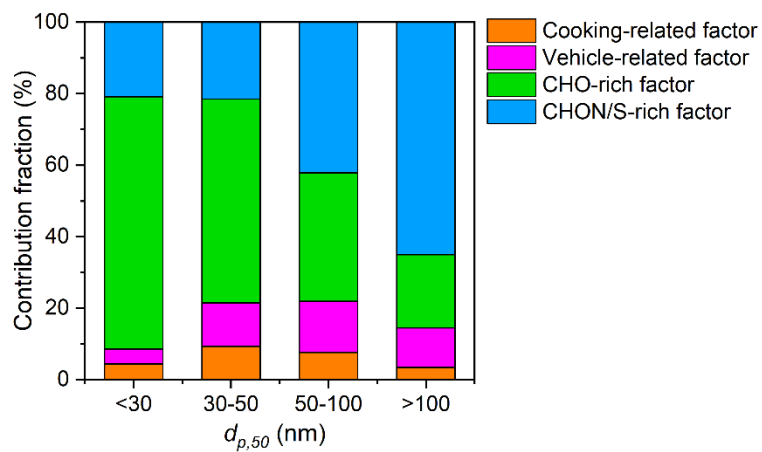

74

75 Figure S12. Contribution of different factors as a function of particle size.  $d_{p,50}$  corresponds to 50%  
 76 volume mean diameter of particles collected on the TDCIMS filament.

77

78 Table S1. Field measurement data summary.

| Measurement targets                             | Instrumentation                   | Measuring periods                                         | Notes                             |
|-------------------------------------------------|-----------------------------------|-----------------------------------------------------------|-----------------------------------|
| UFP composition                                 | TDCIMS<br>(bulk collection mode)  | 2021.1.18-2.14                                            | Winter (24)                       |
|                                                 |                                   | 2021.3.16-4.30                                            | Spring (45)                       |
|                                                 |                                   | 2021.7.11-8.27                                            | Summer (47)                       |
|                                                 |                                   | 2019.10.28-11.30                                          | Autumn (33)                       |
| 1 nm-10 $\mu$ m particle size distribution      | PSD & DEG-SMPS                    | 2019.10.28-2021.8.27<br>Covering all of the above periods | Covering all of the above periods |
| Temperature, Solar radiation, Relative humidity | Weather station (AWS310, Vaisala) | 2019.10.28-2021.8.27<br>Covering all of the above periods | Covering all of the above periods |
| NO <sub>x</sub> , O <sub>3</sub>                | Thermo Fisher analyzer            | 2019.10.28-2021.8.27<br>Covering all of the above periods | Covering all of the above periods |
| Mixing layer height (MLH)                       | Ceilometer (CL51, Vaisala)        | 2019.10.28-2021.8.27<br>Covering all of the above periods | Covering all of the above periods |

79
